# Supplementary material for: The use of a carbon paste electrode mixed with multiwalled carbon nanotube/electroactive polyimide composites as an electrode for sensing ascorbic acid
Source: Royal Society of Chemistry journal article supplement (doi:10.1039/c3py00787a), 2013-09-06
Supplement: c3py00787a.pdf [file c3py00787a.pdf]

## The use of carbon paste electrode mixed with multiwall carbon nanotube/polyimide composites as electrode for sensing ascorbic acid

Tsao-Cheng Huang, Lu-Chen Yeh, Hsiu-Ying Huang, Yi-Chen Chou,  
Jui-Ming Yeh\*

Mass spectrum ( $m/e$ ): calculated for  $C_{40}H_{30}N_4O_7 = 678.6$ . Found 677.2.  $^1H$  NMR ( $d_6$ -DMSO):  $\delta = 8.40$  (s, 1H, due to  $H_4$ ),  $\delta = 8.05$ - $8.03$  (d, 1H, due to  $H_8$ ),  $\delta = 7.63$ - $7.60$  (2H, due to  $H_7, H_9$ ),  $\delta = 7.29$ - $7.23$  (t, 4H, due to  $H_2, H_6$ ),  $\delta = 7.17$ - $7.12$  (t, 4H, due to  $H_3, H_5$ ),  $\delta = 6.87$  (t, 1H, due to  $H_1$ )

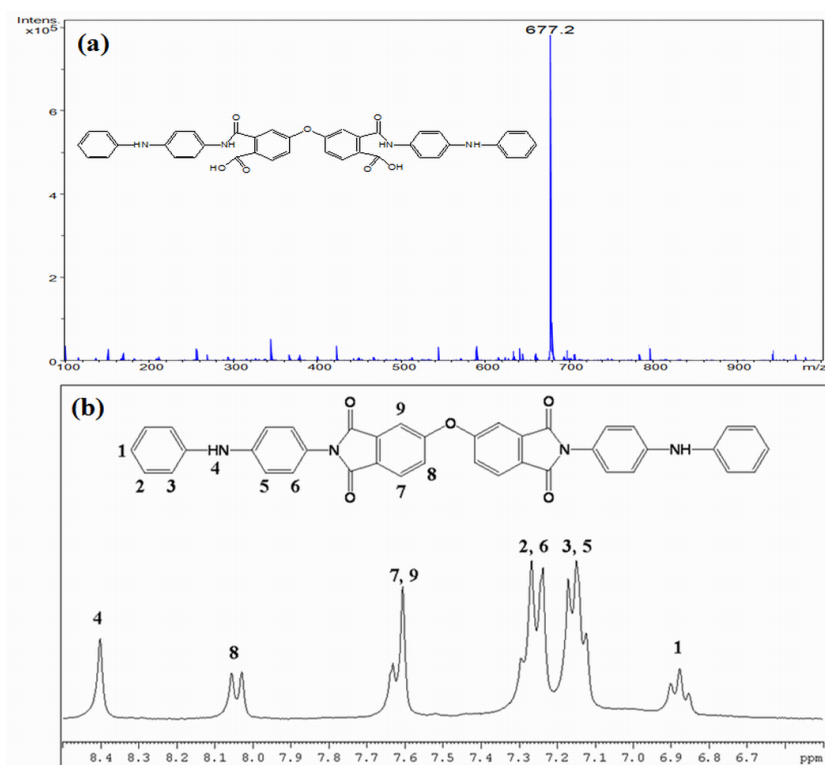

Fig. S1 (a) Mass of oligoaniline and (b)  $^1H$  NMR of imidic monomer of oligoaniline.

The detailed characterizations for imidic monomer of oligoaniline was listed as follows: FTIR (KBr,  $\text{cm}^{-1}$ ): 3380 (s,  $\nu_{\text{NH}}$ ), 1774 (m,  $\nu_{\text{C=O}}$  asymmetric stretching), 1708 (vs,  $\nu_{\text{C=O}}$  symmetric stretching), 1592 (s,  $\nu_{\text{C=C}}$  of benzenoid rings), 1521 (vs,  $\nu_{\text{C=C}}$  of benzenoid rings), 1323 (s,  $\nu_{\text{C-N}}$ ), 1102 (m,  $\delta_{\text{CH}}$ ), 890 (m,  $\delta_{\text{CH}}$ ), 740 (m, imide ring deformation).

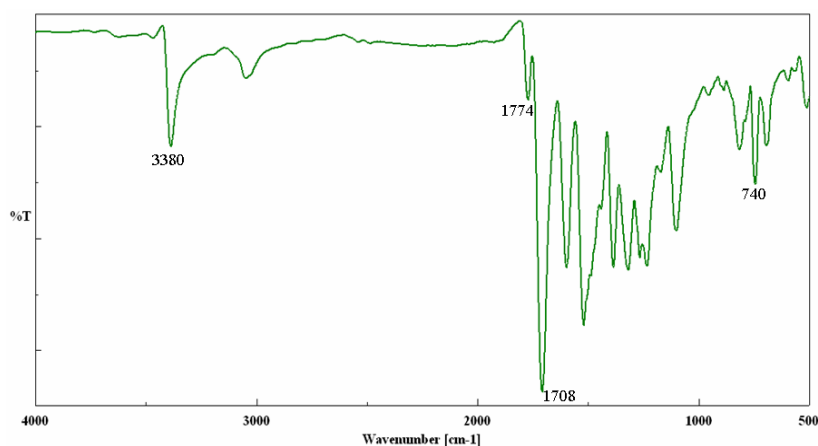

Fig. S2 FTIR spectra of the imidic oligoaniline

The detailed characterizations for EPAA was listed as follows: FTIR (KBr,  $\text{cm}^{-1}$ ): 1711  $\text{cm}^{-1}$  (vs,  $\nu_{\text{C=O}}$  symmetric stretching), 1590 (s,  $\nu_{\text{C=C}}$  of benzenoid rings), 1510 (vs,  $\nu_{\text{C=C}}$  of benzenoid rings).

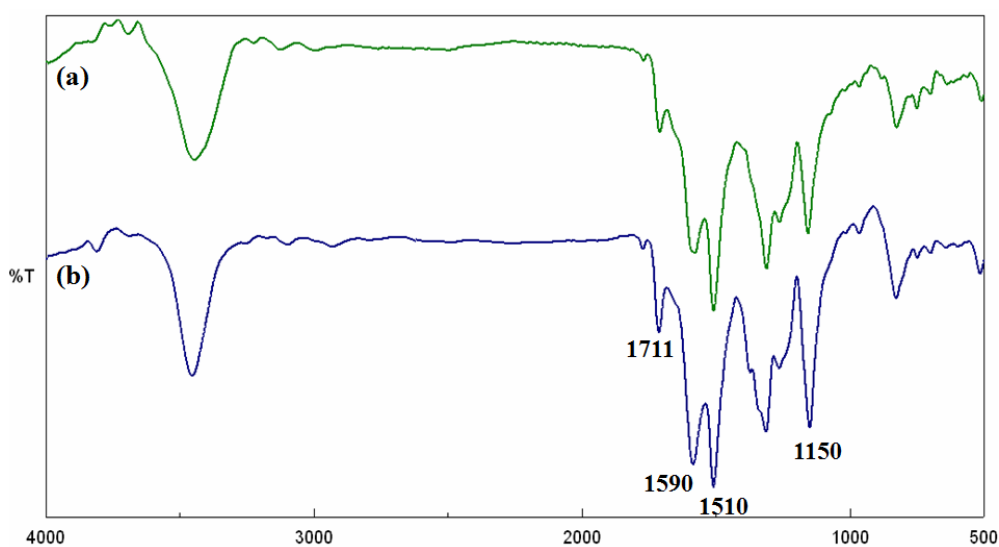

Fig. S3 FTIR spectra of (a) EPAA and (b) AF-MWCNT/EPAA composites

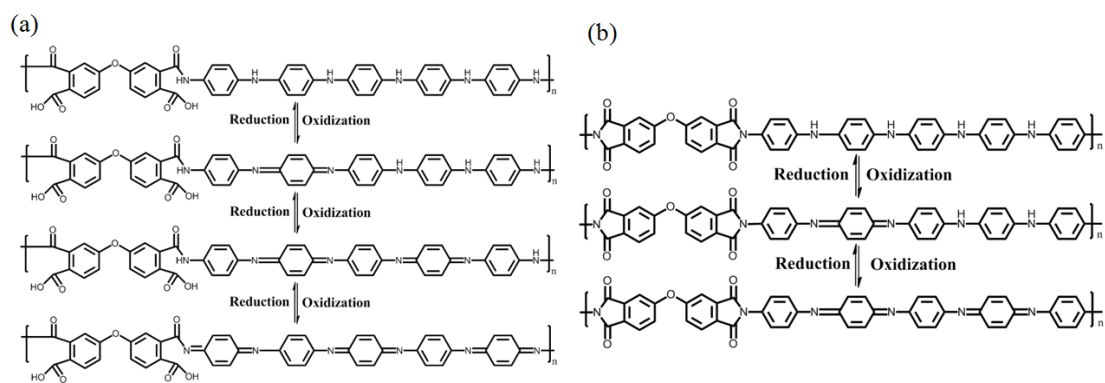

Fig. S4 Molecular structures of (a) EPAA and (b) EPI at various oxidation states

Table S1 The conductivity of AF-MWCNT/EPI

| AF-MWCNTs Loading [wt%] | Conductivity (S/cm)   |
|-------------------------|-----------------------|
| 0                       | $5.46 \times 10^{-6}$ |
| 1                       | $1.32 \times 10^{-5}$ |
| 3                       | $3.55 \times 10^{-3}$ |
| 5                       | $3.31 \times 10^{-1}$ |
| 10                      | $8.87 \times 10^{-1}$ |
